# Supplementary material for: Dosage Compensation of the X Chromosome during Sheep Testis Development Revealed by Single-Cell RNA Sequencing
Source: MDPI journal article supplement (doi:10.3390/ani12172169), 2022-08-24
Supplement: s1 [file s1]

Supplementary Materials: Including 1 supplementary figure

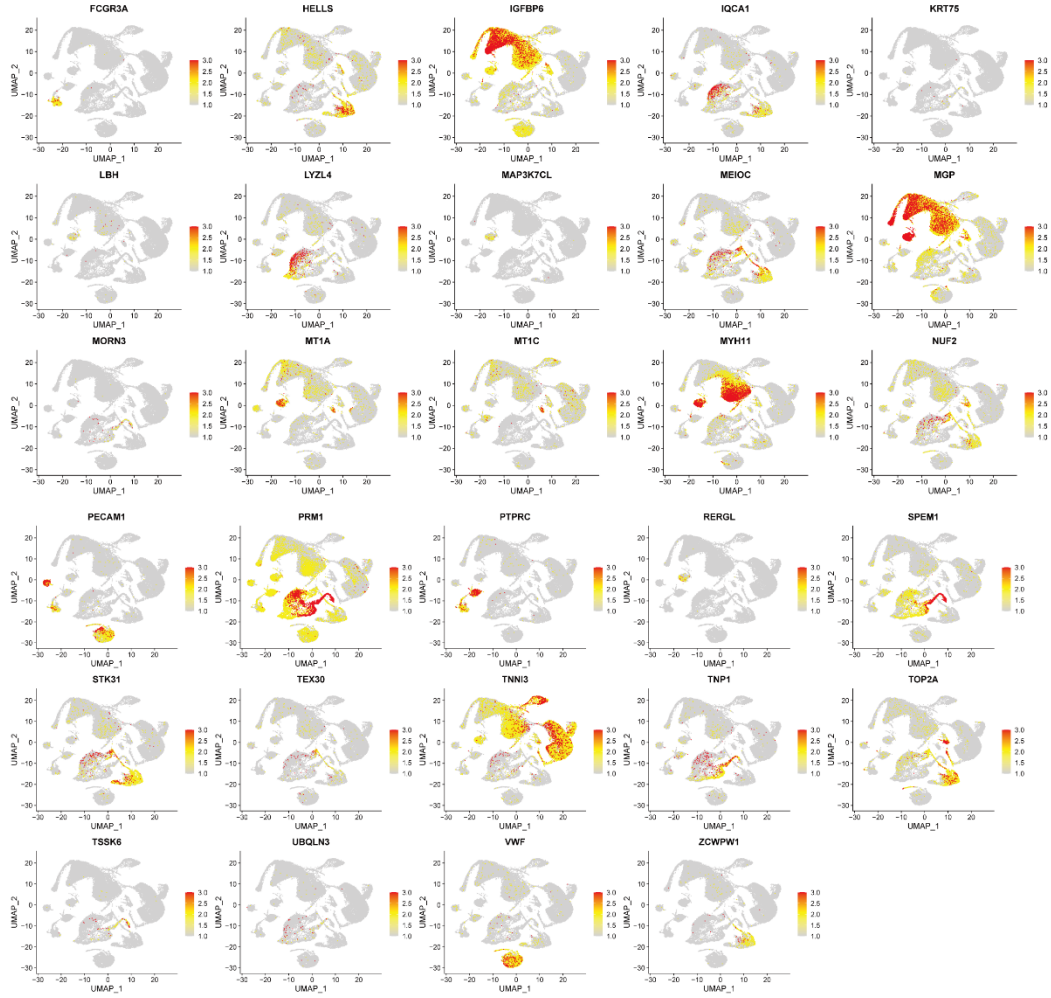

**Figure S1.** The expression patterns of marker genes projected on the UMAP plot. Red indicates high expression and gray indicates low or no expression.
